# Supplementary material for: Enhanced performance of ZnO nanoparticle decorated all-inorganic CsPbBr3 quantum dot photodetectors
Source: Royal Society of Chemistry journal article supplement (doi:10.1039/c9ta00230h), 2019-01-01
Supplement: c9ta00230h1.pdf [file c9ta00230h1.pdf]

Electronic Supplementary Material (ESI) for Journal of Materials Chemistry A.

This journal is © The Royal Society of Chemistry 2018

# Enhanced Performance of ZnO Nanoparticles Decorated All-inorganic CsPbBr<sub>3</sub> Quantum Dot Photodetectors

**Kai Shen,<sup>a</sup> Xiao Li,<sup>a</sup> Hao Xu,<sup>\*a</sup> Mingqing Wang,<sup>b</sup> Xiao Dai,<sup>c</sup> Jian Guo,<sup>d</sup> Ting Zhang,<sup>e</sup>  
Shibin Li,<sup>e</sup> Guifu Zou,<sup>c</sup> Kwang-Leong Choy,<sup>\*b</sup> Ivan P. Parkin,<sup>d</sup> Zhengxiao Guo,<sup>dfg</sup>  
Huiyun Liu<sup>a</sup> and Jiang Wu<sup>\*ah</sup>**

<sup>a</sup>Department of Electronic and Electrical Engineering, University College London, Torrington Place, London WC1E 7JE, United Kingdom.

<sup>b</sup>Institute for Materials Discovery, University College London, Torrington Place, London WC1E 7JE, United Kingdom.

<sup>c</sup>School of Energy, Soochow Institute for Energy and Materials Innovations, and Key Laboratory of Advanced Carbon Materials and Wearable Energy Technologies of Jiangsu Province, Soochow University, Suzhou 215006, China.

<sup>d</sup>Department of Chemistry, University College London, 20 Gordon Street, Bloomsbury, London WC1H 0AJ, United Kingdom.

<sup>e</sup>State Key Laboratory of Electronic Thin Films and Integrated Devices and School of Optoelectronic Information, University of Electronic Science and Technology of China (UESTC), Chengdu, Sichuan, 610054, China.

<sup>f</sup>Departments of Chemistry and Mechanical Engineering, The University of Hong Kong, Hong Kong SAR, China.

<sup>g</sup>Zhejiang Institute of Research and Innovation, The University of Hong Kong, Qingshan Lake SciTech City, Hangzhou, China.

<sup>h</sup>Institute of Fundamental and Frontier Science, University of Electronic Science and Technology of China, Chengdu 610054, P. R. China.

Email: [hao.xu.15@ucl.ac.uk](mailto:hao.xu.15@ucl.ac.uk); [k.choy@ucl.ac.uk](mailto:k.choy@ucl.ac.uk); [jiangwu@uestc.edu.cn](mailto:jiangwu@uestc.edu.cn).

## Contents:

**Fig. S1** (a) TEM image of CsPbBr<sub>3</sub> QDs with 60 μL ZnO injection. The scale bar is 100 nm. (b) The corresponding size distribution.

**Fig. S2** SEM images of CsPbBr<sub>3</sub> QD films with different amounts of ZnO NPs injection: pure CsPbBr<sub>3</sub> QDs, 20 μL ZnO, 40 μL ZnO, 60 μL ZnO, 80 μL ZnO and 100 μL ZnO. The scale bar is 5 μm.

**Fig. S3** Photoluminescence full-width at half-maximum (FWHM) of CsPbBr<sub>3</sub> QDs as a function of the amount of ZnO NPs injection. All the samples were measured under the same condition.

**Fig. S4** *I-V* curve of PGH\_2 photodetector (without ZnO NPs treatment) under dark, white light, 405 nm and 520 nm laser illumination at room temperature, respectively.

**Fig. S5** The transient photoresponse of PGH\_2 photodetector illuminated by 405 nm laser at 1V applied bias. (a) Three reproducible cycles of photoresponse as a function of time. (b) The photoresponsive time of one specific period. (c) The fall time fitted by single-exponential decay.

**Fig. S6** Time response characteristics of PGH\_1 photodetector at 0 V bias voltage, with 405 nm laser excitation. (a) The photoresponsive time of one specific period. (b) The rise time fitted by single-exponential decay.

**Fig. S7** Time response characteristics of PGH\_2 photodetector (without ZnO NPs treatment) at 1 V bias voltage, under 405 nm laser illumination. (a) Response time comparison between before and after. The single-exponential decay fitted fall time curve (b) before and (c) after.

**Table S1.** Summarization of decay lifetime and ratios for each material in TRPL measurements, with different amounts of ZnO NPs decoration. Using multi-exponential decay fitting:  $I(t) = A_1 \exp(-t/\tau_1) + A_2 \exp(-t/\tau_2) + A_3 \exp(-t/\tau_3)$ .

**Table S2.** The details of single-exponential decay fitting for analyzing the rise time of PGH\_1 photodetector in Figure 5g. The rise time was measured under 405 nm laser illumination at 0 V bias.

**Table S3.** The details of single-exponential decay fitting for comparing the fall time of PGH\_2 photodetector before and after from Figure S4 and S6, for stability testing. Both fall time were measured under 405 nm laser illumination at 1 V bias.

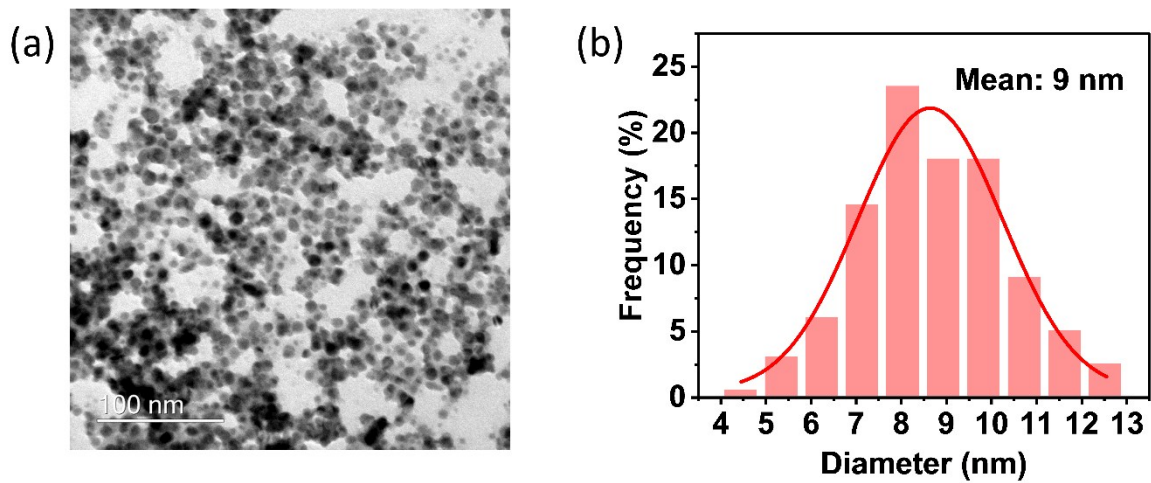

**Fig. S1** (a) TEM image of CsPbBr<sub>3</sub> QDs with 60  $\mu$ L ZnO injection. The scale bar is 100 nm. (b) The corresponding size distribution.

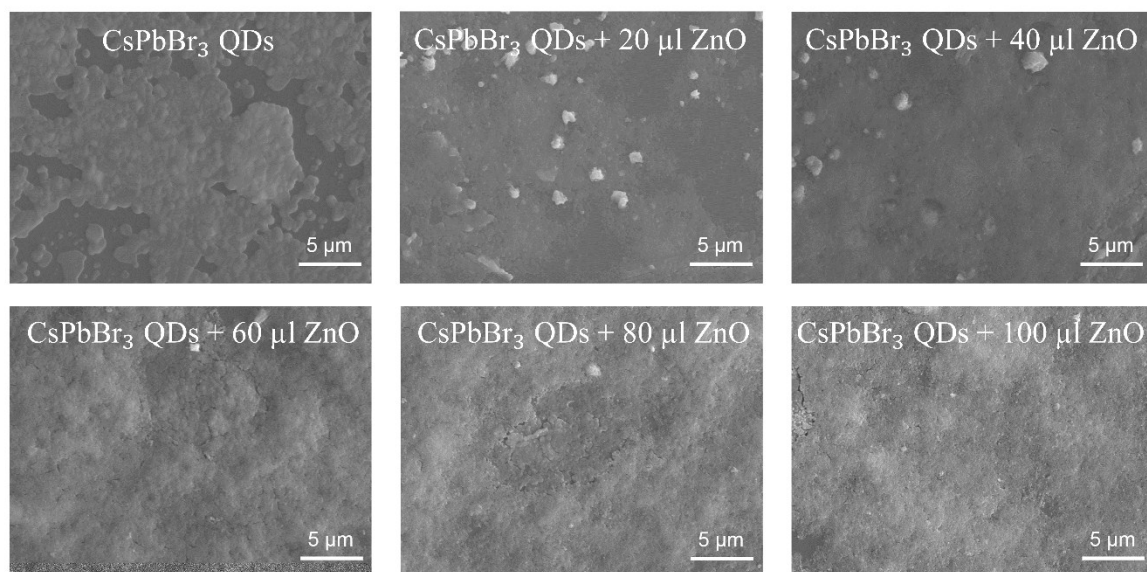

**Fig. S2** SEM images of CsPbBr<sub>3</sub> QD films with different amounts of ZnO NPs injection: pure CsPbBr<sub>3</sub> QDs, 20 μL ZnO, 40 μL ZnO, 60 μL ZnO, 80 μL ZnO and 100 μL ZnO. The scale bar is 5 μm.

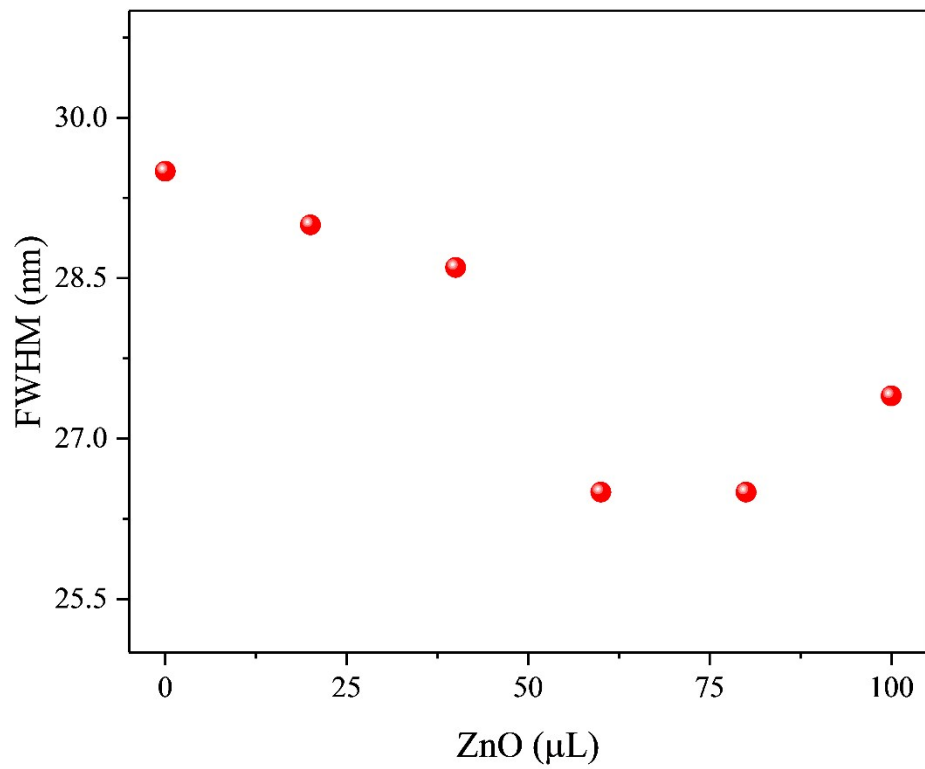

**Fig. S3** Photoluminescence full-width at half-maximum (FWHM) of CsPbBr<sub>3</sub> QDs as a function of the amount of ZnO NPs injection. All the samples were measured under the same condition.

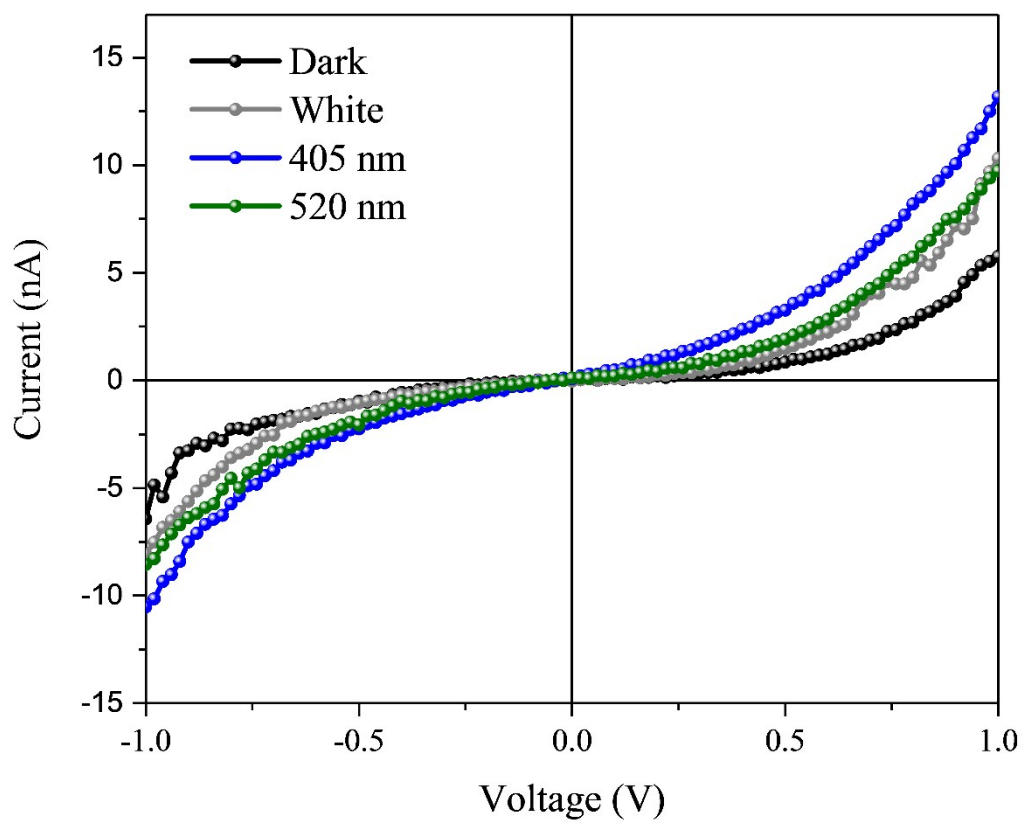

**Fig. S4**  $I$ - $V$  curve of PGH<sub>2</sub> photodetector (without ZnO NPs treatment) under dark, white light, 405 nm and 520 nm laser illumination at room temperature, respectively.

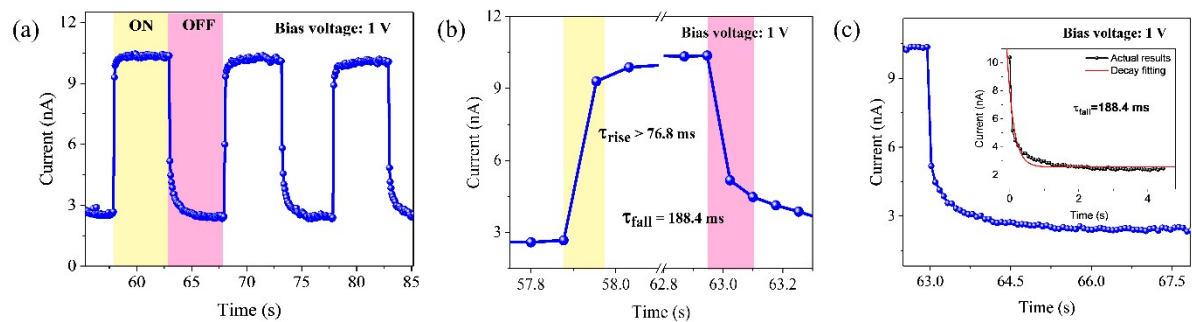

**Fig. S5** The transient photoresponse of PGH<sub>2</sub> photodetector illuminated by 405 nm laser at 1V applied bias. (a) Three reproducible cycles of photoresponse as a function of time. (b) The photoresponsive time of one specific period. (c) The fall time fitted by single-exponential decay.

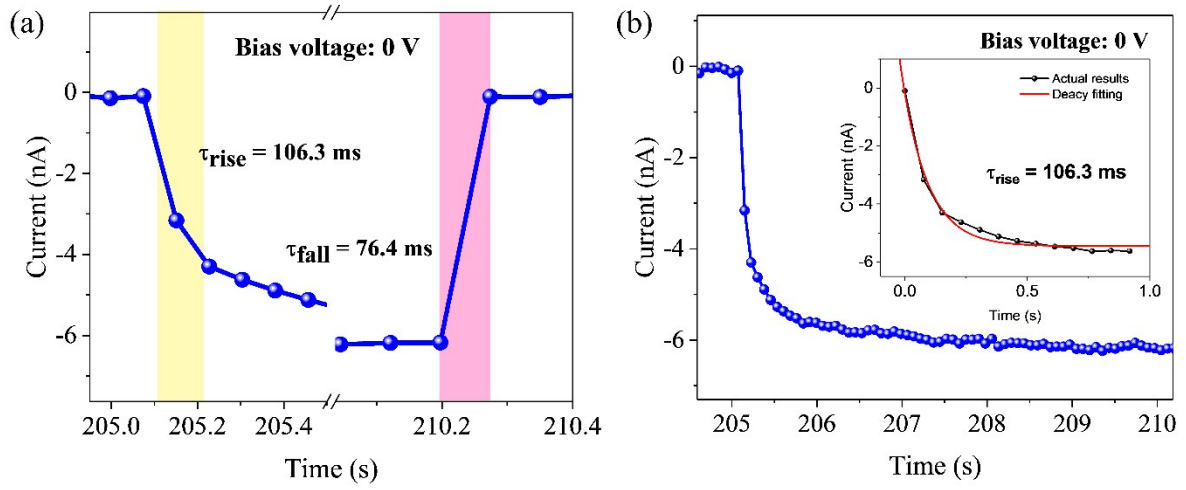

**Fig. S6** Time response characteristics of PGH\_1 photodetector at 0 V bias voltage, with 405 nm laser excitation. (a) The photoresponsive time of one specific period. (b) The rise time fitted by single-exponential decay.



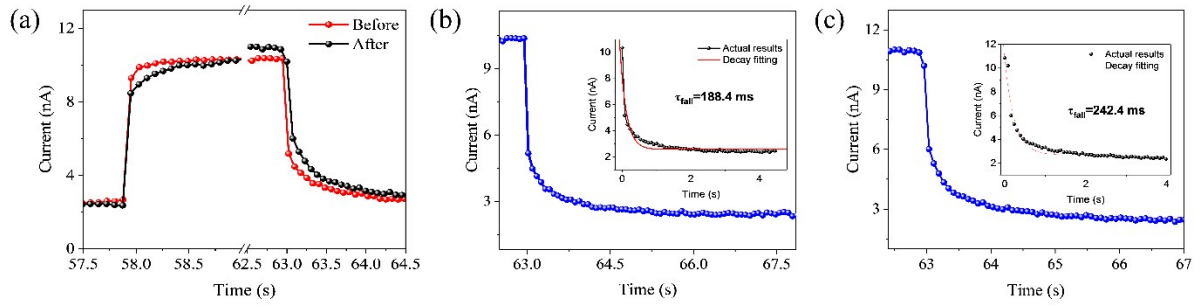

**Fig. S7** Time response characteristics of PGH<sub>2</sub> photodetector (without ZnO NPs treatment) at 1 V bias voltage, under 405 nm laser illumination. (a) Response time comparison between before and after. The single-exponential decay fitted fall time curve (b) before and (c) after.

**Table S1.** Summarization of decay lifetime and ratios for each material in TRPL measurements, with different amounts of ZnO NPs decoration. Using multi-exponential decay fitting:  $I(t) = A_1 \exp(-t/\tau_1) + A_2 \exp(-t/\tau_2) + A_3 \exp(-t/\tau_3)$ .

|                          | Pure   | 20 $\mu$ L | 40 $\mu$ L | 60 $\mu$ L | 80 $\mu$ L | 100 $\mu$ L |
|--------------------------|--------|------------|------------|------------|------------|-------------|
| $\tau_1$ (ns)            | 0.256  | 0.229      | 0.224      | 0.368      | 0.365      | 0.408       |
| $\tau_2$ (ns)            | 1.449  | 1.168      | 1.197      | 1.972      | 1.962      | 2.140       |
| $\tau_3$ (ns)            | 16.955 | 18.623     | 21.142     | 15.462     | 15.782     | 15.607      |
| $A_1$ (%)                | 8.889  | 10.561     | 8.513      | 8.731      | 7.578      | 9.809       |
| $A_2$ (%)                | 13.151 | 15.809     | 14.196     | 23.263     | 22.270     | 21.242      |
| $A_3$ (%)                | 77.960 | 73.630     | 77.291     | 68.006     | 70.153     | 71.949      |
| $\tau_{\text{avg}}$ (ns) | 13.431 | 13.921     | 16.530     | 11.006     | 11.536     | 11.724      |

**Table S2.** The details of single-exponential decay fitting for analyzing the rise time of PGH\_1 photodetector in Figure 5g. The rise time was measured under 405 nm laser illumination at 0 V bias.

| Equation        | $I(t) = A_1 \cdot \exp(-t/t_1) + y_0$ |
|-----------------|---------------------------------------|
| $y_0$           | $-5.45608 \pm 0.06991$                |
| $A_1$           | $5.26002 \pm 0.19008$                 |
| $t_1$           | $0.10626 \pm 0.00854$                 |
| Reduced Chi-Sqr | 0.03526                               |
| R-Square (COD)  | 0.98764                               |
| Adj. R-Square   | 0.98517                               |

**Table S3.** The details of single-exponential decay fitting for comparing the fall time of PGH\_2 photodetector before and after from Figure S4 and S6, for stability testing. Both fall time were measured under 405 nm laser illumination at 1 V bias.

| Equation        | I (t) = A <sub>1</sub> *exp(-t/t <sub>1</sub> ) + y <sub>0</sub> |                   |
|-----------------|------------------------------------------------------------------|-------------------|
|                 | Before (Figure S4)                                               | After (Figure S6) |
| y <sub>0</sub>  | 2.57019 ± 0.05817                                                | 2.69715 ± 0.05802 |
| A <sub>1</sub>  | 5.45073 ± 0.36683                                                | 7.99019 ± 0.31278 |
| t <sub>1</sub>  | 0.18837 ± 0.02268                                                | 0.24238 ± 0.01672 |
| Reduced Chi-Sqr | 0.16600                                                          | 0.13538           |
| R-Square (COD)  | 0.87490                                                          | 0.95068           |
| Adj. R-Square   | 0.87043                                                          | 0.94871           |
